# Supplementary material for: Effects of Soybean Phosphate Transporter Gene GmPHT2 on Pi Transport and Plant Growth under Limited Pi Supply Condition
Source: MDPI journal article supplement (doi:10.3390/ijms241311115), 2023-07-05
Supplement: s1 [file s1]

**Table S3.** The gene chips expression analysis of *GmPHT2;1* and *GmPHT2;2*.

| ID       | Nodule | Leaves | Root | Flower | Green<br>Pods | SAM   | Root | 48 HAI<br>stripped<br>root | Root<br>hairs 12<br>HAI | Root hairs<br>12 HAI<br>mock | Root<br>hairs 24<br>HAI | Root<br>hairs 24<br>HAI<br>mock | Root<br>hairs 48<br>HAI | Root<br>hairs 48<br>HAI<br>mock |
|----------|--------|--------|------|--------|---------------|-------|------|----------------------------|-------------------------|------------------------------|-------------------------|---------------------------------|-------------------------|---------------------------------|
| GmPHT2;1 | 0      | 56.46  | 0.79 | 24.61  | 34.85         | 30.9  | 0.31 | 0.78                       | 2.42                    | 3.18                         | 4.44                    | 1.38                            | 1.54                    | 0.73                            |
| GmPHT2;2 | 0.53   | 97.66  | 0.79 | 32.62  | 32.11         | 32.68 | 0    | 4.15                       | 5.24                    | 5.3                          | 4.72                    | 4.7                             | 2.15                    | 1.47                            |
