# Supplementary material for: Effects of Soybean Phosphate Transporter Gene GmPHT2 on Pi Transport and Plant Growth under Limited Pi Supply Condition
Source: MDPI journal article supplement (doi:10.3390/ijms241311115), 2023-07-05
Supplement: s1 [file s1]

**Table S1.** PHT2 family's genes of 49 plant species.

| Number | Organism                                | Gene ID                         | Protein Length | Number of exons |
|--------|-----------------------------------------|---------------------------------|----------------|-----------------|
| 1      | <i>Ricinus communis</i>                 | 27504.m000647                   | 476            | 3               |
| 2      | <i>Triticum aestivum</i> L.             | AF156696                        | 537            | 3               |
| 3      | <i>Capsicum annuum</i> L.               | AF533081                        | 574            | 3               |
| 4      | <i>Arabidopsis lyrata</i>               | AL5G15360.t1                    | 586            | 3               |
| 5      | <i>Aquilegia coerulea</i>               | Aqcoe3G144600.1                 | 579            | 3               |
| 6      | <i>Arabidopsis thaliana</i><br>columbia | AT3G26570.1                     | 613            | 4               |
| 7      | <i>Solanum melongena</i> L.             | AY293827                        | 568            | 3               |
| 8      | <i>Boechera stricta</i>                 | Bostr.0556s0327.1               | 586            | 3               |
| 9      | <i>Brachypodium</i><br>distachyon       | Bradi3g47550.1                  | 569            | 3               |
| 10     | <i>Brachypodium stacei</i>              | Brast04G151800.1                | 569            | 3               |
| 11     | <i>Capsella grandiflora</i>             | Cagra.3598s0004.1               | 586            | 3               |
| 12     | <i>Capsella rubella</i>                 | Carubv10016883m                 | 601            | 4               |
| 13     | <i>Citrus clementina</i>                | Ciclev10031076m                 | 575            | 3               |
| 14     | <i>Daucus carota</i>                    | DCAR_026513                     | 580            | 3               |
| 15     | <i>Medicago</i>                         | EF094558                        | 550            | 3               |
| 16     | <i>Carica papaya</i>                    | evm.model.supercontig_3<br>3.20 | 586            | 3               |
| 17     | <i>Gossypium raimondii</i>              | Gorai.005G178500.1              | 585            | 3               |
| 18     | <i>Zea mays</i> Ensembl-18              | GRMZM2G092780_T01               | 577            | 3               |
| 19     | <i>Vitis vinifera</i><br>Genoscope.12X  | GSVIVT01005753001               | 388            | 4               |
| 20     | <i>Kalanchoe fedtschenkoi</i>           | Kaladp0034s0076.1               | 579            | 3               |

|    |                                      |                               |     |   |
|----|--------------------------------------|-------------------------------|-----|---|
| 21 | <i>Kalanchoe laxiflora</i>           | Kalax.0023s0132.1             | 579 | 3 |
| 22 | <i>Oryza sativa</i>                  | LOC_Os02g38020.1              | 572 | 3 |
| 23 | <i>Manihot esculenta</i>             | Manes.12G023200.1             | 579 | 3 |
| 24 | <i>Marchantia polymorpha</i>         | Mapoly0138s0013.1             | 613 | 3 |
| 25 | <i>Medicago truncatula</i>           | Medtr8g069390.1               | 574 | 3 |
| 26 | <i>Mimulus guttatus</i>              | Migut.K00598.1                | 583 | 3 |
| 27 | <i>Citrus sinensis</i>               | orange1.1g012038m             | 472 | 3 |
| 28 | <i>Panicum hallii</i>                | Pahal.A02359.1                | 571 | 3 |
| 29 | <i>Panicum virgatum</i>              | Pavir.Aa01470.1               | 614 | 3 |
| 30 | <i>Solanum tuberosum</i>             | PGSC0003DMT4000478<br>69      | 581 | 3 |
| 31 | <i>Phaseolus vulgaris</i>            | Phvul.003G064900.1            | 568 | 3 |
| 32 | <i>Physcomitrella patens</i>         | Pp3c9_7350V3.1                | 589 | 3 |
| 33 | <i>Prunus persica</i>                | Prupe.1G244400.1              | 589 | 3 |
| 34 | <i>Salix purpurea</i>                | SapurV1A.0317s0260.1          | 587 | 3 |
| 35 | <i>Setaria italica</i>               | Seita.1G216200.1              | 572 | 3 |
| 36 | <i>Setaria viridis</i>               | Sevir.1G220000.1              | 572 | 3 |
| 37 | <i>Sphagnum fallax</i>               | Sphfalx0052s0101.1            | 604 | 3 |
| 38 | <i>Theobroma cacao</i>               | Thecc1EG010516t1              | 585 | 3 |
| 39 | <i>Eutrema salsugineum</i>           | Thhalv10003891m               | 586 | 3 |
| 40 | <i>Trifolium pratense</i>            | Tp57577_TGAC_v2_mR<br>NA18371 | 583 | 3 |
| 41 | <i>Zea mays</i> PH207                | Zm00008a022208                | 577 | 3 |
| 42 | <i>Brassica oleracea</i><br>capitata | Bol032193                     | 573 | 3 |
| 43 | <i>Brassica oleracea</i><br>capitata | Bol042818                     | 581 | 3 |

|    |                     |                    |     |   |
|----|---------------------|--------------------|-----|---|
| 44 | Brassica rapa FPsc  | Brara.F03266.1     | 586 | 3 |
| 45 | Brassica rapa FPsc  | Brara.I00256.1     | 573 | 3 |
| 46 | Eucalyptus grandis  | Eucgr.B03285.1     | 475 | 3 |
| 47 | Eucalyptus grandis  | Eucgr.H02499.1     | 572 | 3 |
| 48 | Glycine max         | Glyma.08G282100    | 575 | 3 |
| 49 | Glycine max         | Glyma.18G144100    | 576 | 3 |
| 50 | Sorghum bicolor     | Sobic.004G199900.1 | 572 | 3 |
| 51 | Sorghum bicolor     | Sobic.004G199900.1 | 577 | 3 |
| 52 | Populus trichocarpa | Potri.008G186600.1 | 420 | 3 |
| 53 | Populus trichocarpa | Potri.010G046300.1 | 590 | 3 |

---
