# Supplementary material for: Effects of Soybean Phosphate Transporter Gene GmPHT2 on Pi Transport and Plant Growth under Limited Pi Supply Condition
Source: MDPI journal article supplement (doi:10.3390/ijms241311115), 2023-07-05
Supplement: s1 [file s1]

**Table S2.** 52 PHT2 family protein sequences from 49 species.

>PcPHT2.1  
MAKAFNISSRTASAI AIFIAFAALS LPLFMKSLGTGLDLTKILSYATLLFGFYMAWNIGANDVANAM  
GTSVGS GALSRLRQAVVTA AILEFSGAFLMGTHVTNTMQNGILMANVFEGKNTLLFAGLLSSLAAA  
GTWLQVASYYGWPVSTTHCIVGSMVGFGLVYGGAGAVFWSSLARVTSSWVISPVMGAMVSFLV  
YKCIRRFVYSAPNPGQAAAAA APIAVFAGVTGISFAAFPLSKTFPVALVQALACGAAGAFVYRIIHK  
QLGHLLVKANTTQPEPKESTIQNKNIGFLSDIAGPTGTQLEIVYG VFGYMQVLSACFMSFAHGGND  
VSNAIGPLAAALSILHGGASGTEIVIPTDVLAWGGFGIVAGLTMWGYRV IATIGKKITELTPTRGFAA  
EFAAASVVLVASKLGLPISATHL VGAVMGVGFARGLNSVRAETVREIVASWLVTIPAGATFAVLYT  
WILTKLLSSLL

>TaPHT2.1  
MTLPYRFSSVRNHSLLLKTSHLYTPRSALGCFSPKESPFKKNTAQFLSPQKHTSLPLKLCPLASFSS  
YADSEEEEQHHADQPIQNSHESSTVSSGSDGKGNAEATGDFSGMAQAFHISSTTARAISIVIAFSAL  
TLPIFMKSLGQGLALKTKLLSYATLLFGFYMAWNIGANDVANAMGTSVGS GALTIRQAVMTAAVL  
EFSGALLMGTHVTSTMQKGILMANV FQGKDMLLFAGLLSSLAAAGTWLQVASYYGWPVSTTHCI  
VGSMVGFGLVYGGAGAVFWSSLAKVASSWVISPLL GALVSFLVYKCIRRFVYSAPNPGQAAAAA  
PVAVFVGVASISSAALPLSKIFPIALSQALACGVAGAIVFDRIIRKQLGHLLAKTKSPETSQNQPKTIGF  
LSDIAGPTGTQLEIVYGIFGYMQVLSACFMSFAHGGNDVSNAIGPLAAALSILQNGAAAGGAEIVIP  
MDVLAWGGFGIVAGLTMWGYRV IATIGKKITELTPTRGFAAEFAAASVVL FASKLGLPISATHL VG  
AVMGVGFARGLNSVRAETVREIVASWLVTIPVGATLSVIYTWIFTKILSFVL

>AcPHT2.1  
MTPSHCFSSSIRRIGGGAEAFLLHKQISSHFYYDTHIFKRDDKTLQLKSQPLKSPLLPILRLRSLKPLLPS  
ASLSSFAEPEGEEQEVIIDKKQEDGESDDLPGMAQAFHISSTATAIIFCIAVAALSFPFVMKSMGQG  
MGLKNKILSYTTLLFGFYMAWNIGANDVANAMGTSVGS GALSRLRQAVLTA AVLEFSGALLMGTH  
VTSTMQKGILVANV FQGKDSLLFTGLLSSLAAAGTWLQVASYYGWPVSTTHCIVGAMVGFGLVY  
GGFGAVFWSSLARVTASWVISPFMGA AVSFIVYKCIRRFVYSAPNPGQAAAAA APVAVFVGVT AIS  
FAAFPLSKIVPVAVAQALACGTVGAILVSRVIHKQLGHLLLSNSSQLETNEDASQNKIGILLSDVA  
GPKGTLKIVYG VFGYMQVLSACFMSFAHGGNDVSNAIGPLAAALSILHGGASGAEIVIPIDVLAW  
GGFGIVAGLMIWGYRV IATIGKKITELTPTRGFAAEFAAASVVL FASKLGLPISATHL VGAVMGVGF  
ARGLNSVRAETVKEIVTSWAITIPIGAILAVFYTWILKRLLSGLL

>AtPHT2.1  
MQIHFH HHQYHHQLHSHHPWPISHLYMTLPYRFSSVRNHSLLLKTSHLCTPRSALGCCFSPKESPF  
FRKNTAQFLSPQKHTSLPLKLCPLASFSSYADSEGEEQHHADQPIQNPHESS TVSNESDGKGNAE  
ATGDFSGMAQAFHISSTTARAISIVIAFSALTLPIMKSLGQGLALKTKLLSYATLLFGFYMAWNIGA  
NDVANAMGTSVGS GALTIRQAVMTAAVLEFSGALLMGTHVTSTMQKGILMANV FQGKDMLLFA  
GLLSSLAAAGTWLQVASYYGWPVSTTHCIVGSMVGFGLVYGGAGAVFWSSLAKVASSWVISPLG  
ALVSFLVYKCIRRFVYSAPNPGQAAAAA APVAVFVGVASISSAALPLSKIFPIALSQALACGVAGAIV  
FDRIIRKQLGHLLAKTKSPETSQNQPKTIGFLSDIAGPTGTQLEIVYGIFGYMQVLSACFMSFAHGGN  
DVSNAIGPLAAALSILQNGAAAGGAEIVIPMDVLAWGGFGIVAGLTMWGYRV IATIGKKITELTPTR  
GFAAEFAAASVVL FASKLGLPISATHL VGAVMGVGFARGLNSVRAETVREIVASWLVTIPVGATLA  
VIYTWIFTKILSFVL

>BoPHT2.1  
MTLPYGLSSVRNHSLLLKTSHLCVPRSALGCFSPKESPLFKKNSALFLSPQKHTSFPLKLVHPLASFSS  
YAEGDGDQQIQNSHDSDEKGNAAVGD FSGMANAFHISSTARAITIVIAFSALS LPLFMKSLGQG

LALKTKLLSYATLLFGFYMAWNIGANDVANAMGTSVGSALTIRQAVITAAAVLEFSGALLMGTHVT  
STMQKGILMANVVFQGKDMLLFAGLLSSLAAAGTWLQVASYFGWPVSTTHCIVGSMVGFGLVYG  
GAGAVFWSSLAKVASSWVISPLMGALVSFLVYKCIRRFVYSAPNPGQAAATAAPAAVFLGVASISF  
AAFPLSKIFPIALSQALACGAAGAIIFDRIIRDKLGHLLAKTKPLDTPQNQPKSIGFLSDIAGPTDTQLEI  
VYGVFGYMQVLSACFMSFAHGGSDVSNAIGPLAAALSILQRGATGGGGDIVIPMDVLAWGGFGI  
VAGLTMWGYRVIAITIGKKITELTPTRGFAAEFAAASVVLFAASKLGLPISATHTLVGAVMGVGFARGL  
NSVRAETVKEIVASWLVTIPVGGTLAVIYTWVFTKLLSFVL

>BoPHT2.2

MTLPYGFSSVRNHSLMLKTSHLCPRSAIGCFSPKESPFKKNSAIFLSPQKHTKLVCPASFSSYAE  
GDEQHHGDQIQNSHDSSTNSNESDGKDNPEATGDFSGMANAFNISSKTARAITIVIAFSALSLP  
LFMKSLGQGLARKTKILSYATLLFGFYMAWNIGANDVANAMGTSVGSALTIRQAVITAAAVLEFSG  
ALLMGTHVTSTMQKGILMANVVFQGKDMLLFAGLLSSLAAAGTWLQVASYYGWPVSTTHCIVGS  
MVGFGLVYGGAGAVFWSSLAKVASSWVISPVMGALVSFLVYKCIRRFVYSAPNPGQAAAAAAPV  
AVFVGIASISSAAFPLSKTFPIALSQALACGAAGAIIFDRIIRNKLGHLLAKTKPLDTAQTQPKDIGFLS  
EIAGPTGTQLKIVYGVFGYMQVLSACFMSFAHGGNDVSNAIGPLAAALSILQRGAGAGGGGEIVIP  
IDVLAWGGFGIVAGLTMWGYRVIAITIGKKITELTPTRGFAAEFAAATVVLFAASKLGLPISATHTLVGA  
VMGVGFARGLNSVRAETVKEIVASWLVTIPVGATLAVVYTWVFTKILSFVL

>BsPHT2.1

MTLPYRFSSVRNHSLLLKTSHLCTPRSALGCFSPKESPLFKKNTAQFLSPQKHTSLPLKLVCPASFSS  
YADYEGDEQHHADKPIQNSHESSTDPSGSDGKGNAEATGEFSGMAEAFHISSTTARAISIVIAFSAL  
TLPLFMKSLGQGLALKTKLLSYATLLFGFYMAWNIGANDVANAMGTSVGSALTIRQAVMTAAVL  
EFSGALLMGTHVTSTMQKGIIMANVVFQGKDMLLFAGLLSSLAAAGTWLQVASYYGWPVSTTHCI  
VGSMVGFGLVYGGAGAVFWSSLAKVASSWVISPLMGALVSFLVYKCIRRFVYSAPNPGQAAAAAA  
PVAVFVGVTICISSAALPLSKIFPIALSQALACGVAGAIVFDRIIRKQLGHLLAKTKTPETSQNQPKTIGF  
LSDIAGPTGTQLEIVYGIFGYMQVLSACFMSFAHGGNDVSNAIGPLAAALSILQSGAAAGGGEIVIP  
MDVLAWGGFGIVAGLTMWGYRVIAITIGKKITELTPTRGFAAEFAAASVVLFAASKLGLPISATHTLVG  
AVMGVGFARGLNSVRAETVREIVASWLVTIPVGGTLAVIYTWIFTKILSFVL

>BdPHT2.1

MSQSSPFFSIARAHAGAGGRAAAAAALLRHPAAQLPPSIHCPRYFPLAKLSHAKPLNSHLGFPRATL  
SSFADANDGSSAEPDASEEQNGGSELSEMAKAFHISPTAMSISVVIAFAALTVPAMRSLAFHGTI  
KMKMLAYLTLLSGFYMAWNIGANDVANAMGTSVGSALTIRQAVLTAAVLEFSGAFLMGTHVT  
STMQKGILVASVVFQGNDSLLFAGLLSSLAAAGTWLQVASSYGWPVSTTHCIVGAMVGFGLVYGG  
VNAVFWSSLARVSSSWVISPLMGAASVFLVYKCIRRFVYSAPNPGQAAAAAIAVFTGVTASFA  
AFPLSKIFSIAVLQALGCGAIGAIFVSRAIKKQLGDLLSSEAEKIASASNTDGQQGGFLSDVAGPTGA  
QLQIVYGVFGYMQVLSACFMSFAHGGNDVSNAIGPLAAALSLLQGVATSAEIVIPTEVLAWGGFGI  
VAGLTMWGYRVIAITIGKKITELTPTRGFAAEFAAASVVLFAASKLGLPISATHTLVGAVMGVGFARGL  
NRVRAETVREIVSWVVTIPVGALLAVFYTLILTILKYFM

>BrPHT2.1

MTLPYGFSSVRNHSLMLKTSHLCPRSAIGCFSPKESPFKKNSSRFLSPQKHTSLPLKLVCPASFSS  
YADGDEQHHGDQIQNSHNSSTNSNESDGKGNPEATGDFSGMANAFNISSKTARAITIVIAFSAL  
SLPLFMKSLGQGLALKTKILSYATLLFGFYMAWNIGANDVANAMGTSVGSALTIRQAVITAAAVLE  
FSGALLMGTHVTSTMQKGILMANVVFQGKDMLLFAGLLSSLAAAGTWLQVASYYGWPVSTTHCIV  
GSMVGFGLVYGGAGAVFWSSLAKVASSWVISPVMGALVSFLVYKCIRRFVYSAPNPGQAAAAAA  
PVAVFVGIASISSAAFPLSKTFPIALSQALACGAAGAIIFDRIIRNKLGHLLAKTKPLDTAQTQPKDIGF

LSEIAGPTGTQLKIVYGVFGYMQVLSACFMSFAHGGNDVSNAGPLAAALSILQRGAGAGGGGGE  
IVIPIDVLAWGGFGIVAGLTMWGYRVATIGKKITELTPTRGFAAEFAAATVVLFAASKLGLPISATHTLV  
GAVMGVGFARGLNSVRAETVKEIVASWLVTIPVGATLAVIYTWVFTKILSFVL

>BrPHT2.2

MTLPYGLSSVRNHSLLLKTSHLCVPRALGRFSPKESPLFKKNSALFLSPQKHTSLPLKLVHPLASFSS  
YAEGDGDQQIQNSHDSDEKGNAAEAVGDFSGMANAFHISSKTARAITIVIAFSALSPLFMKSLGQG  
LALKTKLLSYATLLFGFYMAWNIGANDVANAMGTSVGSGALTIRQAVITAAVLEFSGALLMGTHVT  
STMQKGILMANVVFQKDMLLFAGLLSSLAAAGTWLQVASYFGWPVSTTHCIVGSMVGFGLVYG  
GAGAVFWSSLAKVASSWVISPLMGALVSFLVYKCIRRFVYSAPNPGQAAATAAPVAVFLGVASISF  
AAFPLSKIFPIALSQALACGAAGAIIFDRIIRDKLGHLLAKTKPQDTPQNQPKSIGFLSEIAGPTDTQLE  
IVYGVFGYMQVLSACFMSFAHGGSDVSNAGPLAAALSILQRGAAGGGGDIVIPMDVLAWGGFGI  
VAGLTMWGYRVATIGKKITELTPTRGFAAEFAAASVVLFAASKLGLPISATHTLVGAVMGVGFARGL  
NSVRAETVKEIVASWLVTIPVGGTLAVIYTWVFTKILSFVL

>BtPHT2.1

MSQSSPFFSIARAHAGAGGRAAAAAALLRHAPAAQLPPSIHCPRYFPLAKLSHAKPLSSYLGLPRATL  
SSFANANDGSGAEPDASEEQNGGSELSEMAKAFHISPRTAMSISVIAFAALTMPLAMRALAFHG  
TIKMKMLAYLTLLSGFYMAWNIGANDVANAMGTSVGSGALTIRQAVLTAAVLEFSGAFLMGTHV  
TSTMQKGILVASVVFQGNDLFLAGLLSSLAAAGTWLQVASSYGWVSTTHCIVGAMVGFGLVYG  
GVNAVFWSSLARVSSWVISPLMGAASVFLVYKCIRRFVYSAPNPGQAAAAAIAVFTGVTAISF  
AAFPLSKIISIAVLQALGCGAIGAIFVSRAIKKQLGDLLSSEAEKIASASNTDGGQGGFLSDVAGPTGA  
QLQIVYGVFGYMQVLSACFMSFAHGGNDVSNAGPLAAALSLLQGVATSAEIVIPTEVLAWGGFGI  
VAGLTMWGYRVATIGKKITELTPTRGFAAEFAAASVVLFAASKLGLPISATHTLVGAVMGVGFARGL  
NRVRAETVREIVSVWVTIPVGALLAVFYTLILTILKILKYFM

>CgPHT2.1

MTLPYRFSSVRNHSLLLKTSHLCTPRSPGCFSPKESPLFKKNTALFLSPQKHTSLPLKLVCPPLASFSSY  
ADSEGEEQHADQPIQNSHESSTDSSGSDGKGNAAEATGDFSGMAQAFHISSTTARASIVIAFSAL  
CLPLFMKSLGQGLALKTKLLSYATLLFGFYMAWNIGANDVANAMGTSVGSGALTIRQAVMTAAV  
LEFSGALLMGTHVTSTMQKGIIMANVVFQKDMLLFAGLLSSLAAAGTWLQVASYYGWPVSTTHCI  
VGSMVGFGLVYGGAGAVFWSSLAKVASSWVISPLLALVSFLVYKCIRRFVYSAPNPGQAAAAAA  
PVAVFVGVASISSVALPLSKIFPIALSQALACGVAGAIVFDRIIRKQLGHLLAKTKSPETSQNTPKAIGF  
LSDIAGPTGTQLEIVYGIFGYMQVLSACFMSFAHGGNDVSNAGPLAAALSILQNGAAAGGAEIVIP  
MDVLAWGGFGIVAGLTMWGYRVATIGKKITELTPTRGFAAEFAAASVVLFAASKLGLPISATHTLVG  
AVMGVGFARGLNSVRAETVKEIVASWLVTIPVGATLAVIYTWIFTKILAFVL

>CrPHT2.1

MTLPYRFSSVRNHSLLLKTSHLCTPRALGCFSPKESPLFKKNTALFLSSQKHTSLPLKLVCPPLASFSS  
YADSEGEEQHADQPIQNSHESADSSGSDGKGNAAEATGDFSGMAQAFHISSTTARASIVIAFSA  
LCLPLFMKSLGQGLALKTKLLSYATLLFGFYMAWNIGANDVANAMGTSVGSGALTIRQAVMTAA  
VLEFSGALLMGTHVTSTMQKGIIMANVVFQKDMLLFAGLLSSLAAAGTWLQVASYYGWPVSTTH  
CIVGSMVGFGLVYGGAGAVFWSSLAKVASSWVISPLLALVSFLVYKCIRRFVYSAPNPGQAAAAA  
APVAVFVGVASISSVALPLSKIFPIALSQALACGVAGAIVFDRIIRKQLGHLLAKTKSPETSQNTPKAIG  
FLSDIAGPTGTQLEIVYGIFGYMQVLSACFMSFAHGGNDVSNAGPLAAALSILQNGAAAGGAEIVI  
PMDVLAWGGFGIVAGLTMWGYRVATIGKKITELTPTRGFAAEFAAASVVLFAASKLGLPISATHTLV  
GAVMGVGFARGLNSVRAETVKEIVASWLVTIPVGATLAVIYTWIFTKILAFVFLSCRQSKLGDVLLL

>CcPHT2.1

MPPPFCSSSSRNTVSPEAFLFHKHRSSSSALLKPNLSLPRSSYSLLSLKNSRLTHSFASISSFAEAEGE  
EEQNEGLQVQEHHHDEPAKTEAGDDELPGMAQAFHISSTASAIICIALAALTLPFFMKSLGQGL  
DIKTKLLSHATLLFGFYMAWNIGANDVANAMGTSVGSGALT LRQAVLTAAVLEFSGALLMGTHVT  
STMQKGILVASVFQGKDTLLFAGLLSSLAAAGTWLQVASYYGWPVSTTHCIVGSMVGFGLVYGGA  
GAVFWSSLARVTSSWVISPLGALVSFLVYKCIRRFVYSAPNPGQAAAAA APIAVFVGVGTGISFAAFP  
LSKIFPLALAQALAFGAAGAFVYRIIQQLGHLLVKSTSLQPEPKDTNIHNK SIGIFSDIAGPKGTQLE  
IVYGVFGYMQVLSACFMSFAHGGNDVSNAIGPLAAALSILHGSASGTKIVIPIDVLAWGGFGIVSGL  
MIWGYRVIATIGKKITELTPTRGFAAEFAAASVVL FASKLGLPISATHLVGAVMGVGFARGLNSVR  
AETVKEIVLSWAVTIPVGATFAVFYTWILTKLLSFIY

>DcPHT2.1

MTSSYCLSSTRNTVKPRAFLIHSSHFDQSKYRPPFFSLSKKDHKKLLSSRLYFPTLSAENYDLTRPFA  
SLSSFAEADGEENSEKIHALSEHQENEKQQEELQGMAQAFNIPSSSTATAISICIALAALCFPYFMNSL  
GQGMSLTKLLSYGTLLFGFYMAWNIGANDVANAMGTSVGSGALT LRQAVVTAAVLEFSGALLM  
GKHVTGTIQKGILVADVFGKDTLLLAGLLSSLAAAGTWLQVASYYGLPVSTTHCIIGSMVGFGLIY  
GGRDAVFWGSLARVTSSWLISPVTGAAVSFLVYKCIRRFVYSAPNPGQAAAAA APIGVFIGVTGISF  
IAFPLSKILSVAIVQALALGTVGAFLFDRIIRKQLGHLLVKSVAQSDPKEDTIHQKNIGLLAEVAGPK  
GTQLEIVYKVFYMQVLSACFMSFAHGGNDVANAIGPLAGALSILQGGTSGGELIIPIDVIAWGGF  
GIVAGLMMWGYRVIATIGNKITELTPTRGFAAEFAAASVVMFASNGLPISATHLVGAVMGVGFAR  
RGLNSVRAETVKEIVTSWAVTIPVGAVLAIVYTWILNRLLSYVL

>EgPHT2.1

MAQAFGISSRTASAIICIAFAALLPLAMRSLGQGMVKTALSYGTLLFGFYMAWNIGANDVAN  
AMGTSVGSGALT LRQAVLTAAVLEFSGALLMGTHVTSTMQKGILVADVFGKDTLLFAGLLSSLAS  
AGTWLQVASFYGWPVSTTHCIIGSMVGFGLVYGGAGAVFWNSVVRVTSSWVISPLMGALVSFLV  
YKCIRRFVYSAPNPGQAAAAA APIAVFLSVTGISFAAFPLSKTIPLALAQALACGTAGAFVLRMIRK  
QLGHLLDKTDPSQPKPEESMVNRDVGFLSKIAGPTGAQLEIVYGVFGYMQVLSACFMSFAHGGN  
DVANAIGPLASALSILQGGATGTDIVIPIDVLAWGGFGIVAGLIMWGYRVIATIGKKITELTPTRGFAA  
EFAAASVVL FASKLGLPISATHLVGAVLGVGFARGLNSVRAETVKEIVVSWAVTIPVGAVFAVFYT  
WILTKLLSYIL

>EgPHT2.2

MTSSYFLSSTKQYATTPEPLFLLRRRRHHLPRHRVLSLLSSDIGEAHFPRKPSTFPLQLLRPSHRLGKP  
SFATTISSSFEGEEGEQRQDEVPEGMAEAFHISSTATAISVLI AVAVFSFLLMKSQLGAGAPLKS  
RALT YVTLLFGFYMAWNIGANDVANAMGTSVGSGALT LRQAVVTAGVLEFSGALLMGTHVTSTM  
QKGILVAGVFQGD SLLFAGLLSSLAAAGTWLQIASYYGWPVSTTHCIVGSMVGFGLVYGGPGAV  
FWTSLARVMSSWVVSPLMGALVSFVYKCIRRFVYSAPNPGQAAAAA APVAVFVGVTAISFVAFP  
LSKSFPLAVAQALACGTAGAVLVNRIIWKQLGHLLDKAGSSGMEPKEAPALNQNIGFLTEIAGPKG  
TQLEIVYGVFGYMQVLSACFMSFAHGGNDVSNAIGPLAGALSILHGGAGGA EIVPTDVLAWGGF  
GIVAGLMMWGYRVIATIGKKITELTPTRGFAAEFAAATVVL FASKLGLPISATHLVGAVMGVGFAR  
GLNSVRAETVREIVASWAVTIPVGAFVAVYTWILTKLLSYVF

>CpPHT2.1

MTLPYSFSSARNTTTTSPEAFFLHNFHLYLPKHRCYFLCNDTHFRKKDSLLFKYHLNPLHPLPLLRV  
NNCKLTKPFASISSFAEADGGEEQKEGIQIEKQKGEDDDLPGMAQAFHISSTASAIICIAFAALTLP  
FFMKSLAQSLDLRTKLMSYATILLGFYMAWNIGANDVANAMGTSVGSGALT LRQAVVTAAILEFS  
GALLMGSHVTGTMQKGILVASVFQGKDTLLFTGLLSSLASAGVWLQVASYYGWPVSTTHCIVGS  
MVGFGLVYGGAGAVFWSSLARVTSSWVISPLMGALASFLVYKCIRRFVYSAPNPGQAAAAA APIA

VFLGVTGISFAAFPLSKNFPVALVQALACGATGAVLVDRIIRKQLGHLLAKSTSSQKETKENTTRHK  
NLGLLSDIAGPKGTQLEIVYGVFGYMQVLSACFMSFAHGGNDVSNAIGPLAAALSILHGTSSGAELI  
IPTDVLAWGGFGIVAGLMMWGYRVIATIGKKITELTPTRGFAAEFAAASVVLFAASKLGLPISATHTLV  
GAVMGVGFARGLNSVRSETVREIVASWAVTIPVGATLSVIFTWILTLLSCLL

>GmPHT2.1

MNPSCRFSSTKHTSFLHNSHTHLSKTTSPYVFLGHSHSQKPFLSPITTTPYPFNNILRFRNIKLSYP  
FATLSSFAEGEQQENQEGTETPPSNDELGGIAKAFNISSRTASAI SICMALAVLTFPLFMTSLGQGM  
VLKTKVLSYATLLFGFYMAWNIGANDVANAMGTSVGSGALT LRQAVLTA AVLEFSGALMMGTHV  
TSTMQKGILVANVFNGKDSLLFAGLLSSLAAGTWLQFASYYGWPVSTTHCIVGAMVGFGLAYG  
GAGAVFWGSLARVISSWVVSPLMGA AVSFLVYKCIRRFVYSAPNPG LAAAAA APIAVFLGVTGISF  
VAFPLSKSPFALVQALASGTVGAFLVDRIIRKQLGHLLVKSSTPEPEPKEDTVHHHNIGFLDDVAG  
KGAQLEIVYGVFGYMQVLSACFMSFAHGGNDVSNAIGPLAGALAILQGSTMGTETIPTDVLAWG  
GFGIVAGLMMWGYRVIATIGKKITELTPTRGFAAEFAAASVVLFAASKLGLPISATHTLVGAVMGVGF  
ARGFNSVRSETVKEIVASWVVTIPVGASLSVLYTWILT KILSYIL

>GmPHT2.2

MNPSCRFSSTKHTPFLHNSKPTSPFFLRHSHSHSHQVKPFPLSPITTTTAKPYPLNLRNRNIKLSH  
PLATLSSFAEGEEENQKEGAESPNNDELGGIAKAFNISSRTASAI SICMALAVLTFPLFMTSLGQGM  
ALKTKVLSYATLLFGFYMAWNIGANDVANAMGTSVGSGALT LRQAVLTA AVLEFSGALMMGTHV  
TSTMQKGILVANVFNGKDSLLFAGLLSSLAAGTWLQFASYYGWPVSTTHCIVGAMVGFGLAYG  
GAGAVFWGSLARVISSWVVSPLMGA AVSFLVYKCIRRFVYSAPNPG LAAAAA APIAVFLGVTGISF  
VAFPLSKNFP LALA QALACGTVGAFLVDRIIRKQLGHLLVKSNTPEPEPKEDSVHHHNIGFLDDVAG  
PKGAQLEIVYGVFGYMQVLSACFMSFAHGGNDVSNAIGPLAGALAILQGGAGTEIVIPTDVLAW  
GGFGIVAGLMMWGYRVIATIGKKITELTPTRGFAAEFAAASVVLFAASKLGLPISATHTLVGAVMGVGF  
FARGLNSVRSETVKEIVASWVVTIPVGATLSVLYTWILT KILSYIL

>GrPHT2.1

MTPFSCLP CARSTTSPDAFLRYPHLR LPKCRHYEHL PKIENLMFRPFQVPTRPYLPILSLRNSRRT  
HPCANISSFAEAEGGKEQNDEAIHLGTRQEDAKPNEEYLPGMAQAFNISSRTASAI AIFAFAALTLP  
FFMKSLGQGVGVKTKFLSYATLLFGFYMAWNIGANDVANAMGTSVGSGALT LRQAVVTAAILEFS  
GALLMGTHVTGTMQNGILVANMFQGKDTLLFAGLLSSLASAGTWLQVASYYGWPVSTTHCIVGS  
MVGFGLAYGGAGAVFWTSLARVASSWVISPVLGALVSFLVYKCIRRFVYSARNPGQAAAAA APIA  
VFLGVTGISFAAFPLSKSPIALA QALGCGAVGAVLVYNLIRKQLGHLL EKSSASHSEPQESNTQTKN  
LGLLSDVAGPKGTQLEIVYGVFGYMQVLSACFMSFAHGGNDVSNAIGPLAGALSILQGGASSAEIV  
IPNDVLAWGGFGIVAGLLIWGYRVIATIGKKITELTPTRGFAAEFAAASVVLFAASKLALPISATHTLVG  
AVMGVGFARGLNSVRAETVREIVTSWAVTIPVGASLAVLYTWILT KLLSFIL

>ZePHT2.1

MSQSSPLFSVARAHAGAGGRAVAAA LLLRRRPIAQLPHSIHGLRCLSPARATPSKTLLSLPRATLSSF  
ADPDGDGGSSAKASDGGAKAGAGGEEQVGECEMSEMARAFHISPRVATISVTIAFAALTVP LAM  
RSLVCHGTFRMNALAYFTLLSGFYMAWNIGANDVANAMGTSVGSGALT LRQAVLTA AVLEFSGA  
FLMGTHVTSTMQKGILVASAFQGKDSLLFAGLISSLAAGTWLQVASSYGWPVSTTHCIVGAMVG  
FGLVYGGVD AVFWSSLARVSSSWVISPLMGA AVSFLVYKCIRRFVYSAPNPGQAAAAA APIAVFTG  
VTAISFAAFPLSKVFSIAILQAVSSGAIGAIIVSRVIQKQLGDLLSSEAEKIASAEKSSAQQAGFLSDIAG  
PTGAQLQIVYGVFGYMQVLSACFMSFAHGGNDVSNAIGPLAAALSILQGVASSAEIVIPTEVLAW  
GGFGIVAGLTMWGYRVIATIGKKITELTPTRGFAAEFAAASVVLFAASKLGLPISATHTLVGAVMGVGF  
ARGLNRVRAETVREIVASWLVVTIPVGAVLSIFYTLILT KILAYFM

>VvPHT2.1

MAWNIGANDVANAMGTSVGSGALT LRQAVLTA AVLEFSGALLMGTHVTSTMQKGILVANVFQ  
GKDTLLFAGLLSS LAAAGTWLQVASFYGWPVSTTHCIVGSMVGFGLVYGGHGAVFWSSSLARVTSS  
WVISPLMGAMVSFLVYKCIRRFVYSAPNPGQAAAAA APLAVFVGVTGISFAAFPLGDSLPSALPKA  
LACGVAGAF LVYRIHKQLGTQLEIVYGVFGYMQILSACFMSFAHGGNDVSNAIGPLAAALSILQG  
GTGGSEIVIPLDVLAWGGFGIVAGLMMWGYRVISTIGKKITELTPTRGFAAEFAAASVVL FASKLGLP  
ISATHTLVGAVMGVGFARGLNSVRAETVREIVSWAVTIPVGALLSVFYTWILT KLLAFIP

>KfPHT2.1

MTTSYYCLSFARNVAGAAKLENLKPSYTRHIHLPKIRASKVHPGSLSFVGDELRLKPSTFRHPFASLSS  
FAEAGGGEEEDNEHGRGKSSHEAPSKGDEDNSSGMAQAFNISSRTATAISVVIAFAALS FPLFMQS  
VSAGLDLKIRALSYATLLFGFYMAWNIGANDVANAMGTSVGSGALT LRQAVLTA AVLEFSGALLM  
GRHVTSTMQKGILVAEVFQ GKDMLLFAGLLSALAAAGTWLQVASYYGWPVSTTHCIVGAMVGF  
GLVYGGTGAVFWSSIARVTSSWVISPALGALVSFLVYKCIRRFVYSAPNPGQAAAASAPIAVFVGVT  
GISFASFPLSQTPHAILQALACGTVGAVLVNRVIRRLQGHLLDQAEPTPPAEKEEAHQTKNIGFLSD  
IAGPKGTQLEIVYGVFGYMQILSACFMSFAHGGNDVSNAIGPLSAALSILQGVASGSEIVIPLDVL  
WGGFGIVAGLMMWGYRVIA TIGKKITELTPTRGFAAEFAAASVVL FASKLGLPISATHTLVGAVMG  
VGFARGFNSVRAETVREIVASWAVTIPVG AFAVLYTWILT KLLGYIL

>KIPHT2.1

MTTSYYCLSFARNVAGAAKLENLKPSYTRHIHLPKIRASKVHPGSLSFVGDELRLKPSTFRHPFASVS  
SFAEAGGGEEEDNEHGRGKSSHEAPSKGDEDNSSGMAQAFNISSRTATAISVVIAFAALS FPLFMQ  
SVSAGLDLKIRALSYATLLFGFYMAWNIGANDVANAMGTSVGSGALT LRQAVLTA AVLEFSGALL  
MGRHVTSTMQKGILVAEVFQ GKDMLLFAGLLSALAAAGTWLQVASYYGWPVSTTHCIVGAMVGF  
FGLVYGGTGAVFWSSIARVTSSWVISPALGALVSFLVYKCIRRFVYSAPNPGQAAAASAPIAVFVGVT  
TGISFASFPLSQTPHAILQALACGTVGAVLVNRVIRRLQGHLLDQAEPTPPAEKEDAHQTKNIGFLS  
DIAGPKGTQLEIVYGVFGYMQILSACFMSFAHGGNDVSNAIGPLSAALSILQGVASGSEIVIPLDVL  
AWGGFGIVAGLMMWGYRVIA TIGKKITELTPTRGFAAEFAAASVVL FASKLGLPISATHTLVGAVM  
GVGFARGLNSVRAETVREIVASWAVTIPVG AFAVLYTWILT KLLGYIL

>OsPHT2.1

MSQSSPFFSVARAHAGAGGRAAAAAALLRHPVAQLPPRIHGLRYYP SAIVSPA KTLNSHLSLPHATI  
SSFANADNGSSGQADATESEEEQNGESELSEMAKAFHISPRMAM SISVVIAFAALT VPLAMQSVV  
FHGTNKMALAYLTLLSGFYMAWNIGANDVANAMGTSVGSGALT LRQAVLTA AVLEFSGAFLM  
GTHVTSTMQKGILVASVFQ GKDSLLFAGLLSS LAAAGTWLQVASSYGWPVSTTHCIVGAMVGF GI  
VFGGVNAVFWSSSLARVSSSWVISPLMGAAVSFIVYKGIRRFVYSAPNPGQAAAAA APIAVFTGVTA  
ISFAAFPLSKTFSIAILQALACGAIGAVIVNRVIQQLGDLLSSEAEKIASADKANAQQV GFLSDIAGP  
TGAQLQIVYGVFGYMQVLSACFMSFAHGGNDVSNAIGPLAAALSILQGVASSAEIVIPTEVLAWG  
GFGIVAGLTMWGYRVIA TIGKKITELTPTRGFAAEFAAASVVL FASKLGLPISATHTLVGAVMGVGF  
RGLNRVRAETVREIVASWLV TIPVGAVLSIFYTLLFTKILAYFM

>MePHT2.1

MTSFYCLSTRNTVTPETVLCNSYLCLSRNRWHRESNFSKTYQLPSKPFLPILRLDNSKLAYPFASISS  
YAEAGGEEEQKEG IQIEKHQETVKNHENDLPGMAQAFHISSTAS AISIFIAFAALT LPLFMKSLGQG  
LGLKTKLLSYTTLLFGFYMAWNIGANDVANAMGTSVGSGALS LRQAVVTAAILEFAGALLMGTHV  
TNTMQKGILVANVFNGKDTLLFAGLLSS LAAAGTWLQVASYYGWPVSTTHCIVGSMVGFGLVYG  
GAGAVFWSSSLARVTSSWVISPI MGAIVSFLVYKCIRRFVYSARNPGQAAAAA APIAVFVGVTGISFA  
AFPLSKIFPLALA QALACGAAGAF LVSRIIHKQLGHLLV KANSTQPEPQESSSTTHNKTIGFLSDVAG

PKGTQLELVYGVFGYMQVLSACFMSFAHGGNDVSNAGPLAAALSIIHGGASGTEIVIPTDVLAWG  
GFGIVAGLTMWGYRVIATIGKKITELTPTRGFAAEFAAASVVLFAASKLGLPISATHTLVGAVMGVGFAR  
GLNSVRAETVREIVASWLV TIPAGALFAVIYTWIMTKLLSPML

>MpPHT2.1

MSAVVAALAGGRPHFSTLHDRVSSSASHHDHKTVPFRQRPARGLPVLSLSLTTPLSLKVYKSLR  
SPLTFVGRNGTRSLTVRSSSIANADDFNVNDGVEKLPEAENMHEGPPSAEDNGTLVRGLSPAHA  
GANDVANAMGTSVSGALSRLQAVLTAAVLEFGGAFLVGSHTMKGILRMTVFEGKETLLF  
CGMLSSLAAAGTWLQVASFFGWVSTTHCIIGAMVGFGLLYGGIGAVYWSSLLRVVSSWVSPF  
MGAAVSFLVYMCIRLFVYSAPNPGQAAATVAPIAVFIGVAALSATAFP RSTLLLTAAQALGLGAV  
GAVVINMVIQRQLGSLLGEFCAIPTDDKEEKPLSRSPMKVGGPTGTQLKVVSIFGYLQVLSACFMS  
FAHGANDVANAIGPISAAILHGTSLSADLGLPAEILAWGGFGIVAGLMVWGYRVIATIGKKITEL  
TPTRGFAAEFAAASVVVASRLGLPISATHTLVGAVMGVGFARGLNSVRGEVVREIVASWMVTIPV  
GAVLSVVYTLILSKMIPSIF

>MtPHT2.1

MNLNHSCGFSLT KHTRKTSLTSSYLNRNSHIFLSREFLHVKPLPLSPNIAKNLKNCKLTHPFASLSSFAE  
AEGEEGSKEEIQ LNEHHQHAATENGENDDEVSGMAKAFHISSRTASAITICIVMAALVFPLFMTSL  
GQGLALKTKMLS YGTL LFGFYMAWNIGANDVANAMGTSVSGALSRLQAVLTAAVLEFSGALLM  
GTHVTSTMQKGILVANVFQGKDTLLFAGLLSSLAAAGTWLQFASYGWVSTTHCIVGAMVGF  
LVYGGAGAVFWGSLARVISSWIFSPLLGAAVSFIVYKCIRRFVYSASNPGQAAAAA APIAVFLGVTGI  
SFAAFPLSKIFPIALSQALACGTGAFVLNRTIRKQLGHLLDKSNTPDLEVPQNISFFSDITGPKGTQ  
LEIVYGVFGYMQVLSACFMSFAHGGNDVSNAGPLAGALAILQGAAGADIVIPIDVLAWGGFGIV  
AGLMMWGYRVIATIGKKITELTPTRGFAAEFAAASVVLFAASKLGLPISGHTLVGAVMGVGFARGF  
NNVRSETVKEICASWAVTIPVGATLSVIYTWILTKLLSYVL

>MgPHT2.1

MTSSSSSYSSLSTKN TFLQFRPSQIYLPNYRPSVEFEPHCLRRDFLSLKPQLQSITKPISLSLLTLSSNG  
FSRPFAAVSSFAEGDGDGDSAPPKEESAADGEELRGMAQAFHISSGTAS AISVCIAVAALVPLFM  
TSLGQGLPFKTRALS YATLLFGFYMAWNIGANDVANAMGTSVSGALSRLQAVLTAAVLEFSGAL  
LMGTHVTSTMQKGILVADVFRGKDTLLFAGLLSSLAAAGTWLQVASYGWVSTTHCIVGSMVG  
FGLVYGGTGAVFWSSLARVTSSWVVSPLVGALASFLVYKCIRRFVYSAPNPGQAAAAA APIAVFLG  
VTGISFAAFPLSKTLPIAVAQALSAGTAGAFLVDRTIRKQLGHLLANS AEEEADSAGAKSESKNIGFL  
SDIAGPTGTNLEIVYGVFGYMQILSACFMSFAHGGNDVSNAGPLAAALSILQGGMTGGEIVIPND  
VLAWGGFGIVAGLMMWGYRVIATIGKKITELTPTRGFAAEFAAASVVLGASKLGLPISATHTLVGAV  
MGVGFARGLNSVRAETVREIVTSWAVTIPAGATFAVIYTWILTKVLSYVL

>CsPHT2.1

MPPPFCSSSSRNTVSPEAFLLHKHRSSSSALLKPNLSLPRSSYSLLSLKNSRLTHSFASISSFAEAE  
GEEEQNEGLQVQKHHD EPTKTEAGDDDLPGMAQAFHISSSTAS AISICIALAALTLPFFMKSLGQ  
GLDIKTLLSHATLLFGFYMAWNIGANDVANAMGTSVSGALT LRQAVLTAAVLEFSGALLMGTH  
VTSTMQKGILVTSVFQGKDTLLFAGLLSSLAAAGTWLQVASYGWVSTTHCIVGSMVG FGLVYG  
GAGAVFWSSLARVTSSWVISPI LGALVSFLVYKCIRRFVYSAPNPGQAAAAA APIAVFVGVTGISFA  
AFPLSKIFPLALAQALAFGAAGAFVYRIIHKQLGHLLVKSTSLQPEPKDTNIHNKSIGIFS DIAGPKGT  
QLEIVYGVFGYMQVLSACFMSFAHGGNDVSNAGPLAAALSILHGGASGTKIVIPIDVLAWGGFGI  
VGD

>PhPHT2.1

MSQSSRFFSIARAHAGAGGAAAAATLLLRQPVAQLPPIHSLRCFSSARVTD AKTLRSHLSLPRALLS  
SFADADDGSGTKAGDAEAREERNGESEMSEMAKAFHISPRMAMSSVMIAFAALTAPLAMRSLVC  
HGTFKMSVLAYLTLLSGFYMAWNIGANDVANAMGTSVSGGALT LRQAVLTA AVLEFSGAFLMGT  
HVTSTMQKGILVASVFQ GKDSLLFAGLLSSLASAGTWLQVASSYGWPVSTTHCIVGAMVGFGLVY  
GGVNAVFWSLAKVSSSWVISPLMGA AVSFLVYKCIRRFVYSAPNPGQAAAAA APIAVFTGVT AIS  
FVAFPLSKVFPIALLQALSCGAVGAIIVTRVIQKQLGELLSSAEKIASAEKADVQQVGF LSDIAGPTG  
AQLKIVYG VFGYMQVLSACFMSFAHGGNDVSNAIGPLAAALSILQGVASSAEIVIPTEVLAWGGFG  
IVAGLAMWGYRVIATIGKKITELTPTRGFAAEFAAASVVL FASKLGLPISATHTLVGAVMGVGFARGL  
NRVRAETVREIVASWLVTIPVGAVLCIFYTMILT KILAYFM

>PvPHT2.1

MLISSHRFLLPPLSLLLPPLLPLNLISFLLLPPLAPLFCFRHSMSSQSSPFFSIARAHAGAGGWTAAAALL  
LRQPVAQLPPIQSLRCFSSARVTD AKTLRSHLSLPRASLSSFADADDGSGTKAGDAEAREKRNGESE  
MSEMAKAFHIPPRMAMSSVMIAFAALTMPLAMRSLVCHGTFKMSVLAYLTLLSGFYMAWNIGA  
NDVANAMGTSVSGGALT LRQAVLTA AVLEFSGAFLMGTHVTSTMQKGILVASVFQ GKDSLLFAG  
LLSSLAAAGTWLQVASSYGWPVSTTHCIVGAMVGFGLVYGGVNAVFWSLARVSSSWVISPLMG  
AAVSFLVYKCIRRFVYSAPNPGQAAAAA APIAVFTGVT AISFVAFPLSKVFPIALLQALSCGAVGAIIV  
TRVIQKQLGELLSSAEKIESAEKADVQQVGF LSDIAGPTGAQLQIVYG VFGYMQVLSACFMSFAH  
GGNDVSNAIGPLAAALSILQGVASSAEIVIPTEVLAWGGFGIVAGLAMWGYRVIATIGKKITELTPTR  
GFAAEFAAASVVL FASKLGLPISATHTLVGAVMGVGFARGLNRVRAETVREIVASWLVTIPVGAVLC  
IFYTMILT KILAYFM

>StPHT2.1

MTSSYSLSIRNSTKFVANNSNLFFPRQRLCVFTNETQFPKKDFLVLPQTCSFSFLRLKKSSFTHPFA  
ALSSFAESDDEKGENFEVKSHQEKAISSENEDELPGMAQAFNISSTASAVAICIALAALIPFFMKSL  
GQGLGLKYKILSYVTILFGFYMAWNIGANDVANAMGTSVSGGALSRLQAVVMAGVLEFSGALLM  
GTHVTNTMQKGILVTNVFQ GKDTLLFAGLLSSLAAAGTWLQVASYYGLPVSTTHCIVGSMVGFGL  
VYGGTGAVFWSSLARVISSWVISPLLGA VVSFLVYKCIRRFVYSARNPGKAAATAAPISVFLGVTGIS  
FIALPLSKTLNLALGQAITCGAISAFVDRIIRGQLGHLLARASSKEPEPEPETTDTKNIGFLSDIAGPK  
GTQLKIVYG VFGYMQVLSACFMSFAHGGNDVSNAIGPLASALSILQGGLSAADIVIPNDVLAWGG  
FGIVAGLTMWGYRVIATIGKKITELTPTRGFAAEFAAASVVL CASKLGLPISGHTLVGAVMGVGFAR  
GFNSVRAETVREIATSWAVTIPAGATFAVIYTWIFTKL LSYLL

>PvPHT2.1

MNPSCRFASKHTPFLQNSHITSPFFLRHSHRVKTHLSLPSPTIAPKPSSVNILRFRHLGA AKRFATLS  
SFAEGEAGGREEEVQAANGNEVDGLAKAFDISSGTASAISICMALAVLSFPLMMKSLGQGLAVKTK  
VLSYATLLFGFYMAWNIGANDVANAMGTSVSGGALT LRQAVLTA AVLEFSGALLMGTHVTNTM  
QKGILLANVFNGKDTLLFAGLLSSLAAAGTWLQIASYYGWPVSTTHCIVGAMVGFGLAYGGAGAV  
FWGSLARVISSWVVSPLMGA AVSFLVYKCIRRFVYSAPNPGLA AAAAA APIAVFMGVTGISFVAFPLS  
KSFPLALAQALVSGTVGAFLVDRIIRKQLGHLLVKSNTPKPESKEDTVHHNIGFLDDVAGPKGAQLE  
IVYG VFGYMQVLSACFMSFAHGGNDVSNAIGPLAGAILQGAAGAEIVIPIDVLAWGGFGIVA  
GLMMWGYRVIATIGKKITELTPTRGFAAEFAAASVVL FASKLGLPISATHTLVGAVMGVGFARGFNS  
VRSETVKEIVASWVVVTIPVGAVLSVIYTWILTRILSYL

>PtPHT2.1

MVGFGLVYGGRGAVFWSSLARVTSSWVISPLMGAMVSFLVYKFIRRFVYSAPNPGQAAAAA APIA  
VFLGVTGISFAAFPLSEIFPLALAQALACGTTGAFLVDRIIRKKLGHLLVKASSTQPELKENAIH SKNIG  
FLSDFAGPKGTQLEIVYG VFGYMQILSACFMSFAHGGNDVSNAIGPLAAALSILHGGASGTDIVIPI

DVLAWGGFGIVAGLMMWGYRVIATIGKKITELTPTRGFAAEFAAASVVLVASKLGLPISATHTLVGA  
VMGVGFARGLNSVRAETVREIVVSWAVTIPAGAIFAVFYTWILTKLLSYIL

>PtPHT2.2

MTLFYTLSSSTRNIISPETHVLHNSHFYLPNRNSSFFSNETTLFKRETLFPKPQQQQPTGSFPILRLKN  
SKLAHPFASISSYAEAGGEEKNEGVQIEEHQETVKKKENDSPGMAQAFDISSRTAS AISILIAFAALS  
LPLFMKTLGQGLDLKTKFLSYVTLLFGFYMAWNIGANDVANAMGTSVGSGALTIRQAVLTAAVLE  
FSGALLMGTHVTGTMQKGILVANVFQGKDTLLFAGLLSSLAAAGTWLQVASYYGWPVSTTHCIV  
GSMVGFLVYGGPGAVFWSSLARVTSSWVISPLMGAMVSFLVYKFIRRFVYSAPNPGLAASAAAAAP  
IAVFLGVTGISFAAFPLSKVFPLALAQALASGAVGAFLVDRIIRKQLGHLLVKASSSQPEPKENAIHSK  
NIGLLSDFAGPKGTQLEIVYGVFGYMQILSACFMSFAHGGNDVSNAIGPLAAALSILHGGASGTEIV  
IPMDVLAWGGFGIVAGLMMWGYRVIATIGKKITELTPTRGFAAEFAAASVVLVASKLGLPISATHTL  
VGAVMGVGFARGLNSVRAETVREIVVSWAVTIPVGAIFAVFYTWILTKLLSYIL

>PpPHT2.1

MGSMTRLGQGITPLESNVKS LHIRISRNGVHGFRTPPHLYRFGRQCKKSIVPIQIEPNNDGILKPEIQ  
WCGIKPRRSLGCRASSADAGTGD LHGNIGNDFRSEVGIVKEEATNGGPKGMAEAFDISPRTALGIT  
AVIAISVLVLP MYMPSSGVGMTLRTRGLSYL TLLGFYMAWNIGANDVANAMGTSVGSGALTIRQ  
AVLTAAVLEFSGAFMVGSHVSHTMQSGILTSPSVFAGKETLLFCGMLSSLGAAGTWLQVASYFGWP  
VSTTHCIIGAMVGFLVYGGVGAVYWKSLFRVSSWVVSPLLGA FVSFLVYKCIRRFVYRAPNPGQ  
AAATAAPLAVFLGVAALSFTVLPTQGVGLMAGGKALGLL GAVIINIVIRRQLGELLGAYCELPSEE  
EQQGKASRDEGPKGTQLKIVYSVFGYLQVLSACFMSFAHGANDVANAIGPISAALAILHKTGVASG  
GPPSMPVDVLAWGGFGIVAGLVVWGYRVIATIGQKITELTPTRGFAAEFAAATVVVLASRLGLPISA  
THTLVGAVMGVGFARGLNSVRTDVREIVASWVVTIPVGAALSVAYTFIFIKLIPSLV

>PePHT2.1

MTPSYCLSSARNITPEAFLLHNSHLYLPKHRSFSFSTETHFPRKETNFLRPQTPLPKSFLPILRLNNSK  
ITQPFASLS SFAEAGEKQQNQDAKAEHHENAKTEDQAESPGMAQAFHISSRTAS AISICIVFAAL  
SLPFFMKSLWQGMALKTKMLS YATLLFGFYMAWNIGANDVANAMGTSVGSGALTIRQAVVTA  
VLEFSGAFFMGTHVTSTMQKGILVANVFQGKDTLLFAGLLSSLAAAGTWLQVASYYGWPVSTTHC  
IVGSMVGFLVYGGAGAVFWSSLARVISSWVSPFMGALVSFLVYKCIRRFVYSAPNPGQAAAAA  
APIAVFVGVS GISFAAFPLGENLALALARALACGIAGAVLVYRIIRKQLGHLLKSTSSEAEQKEGTIHP  
KNIGFLSDIAGPTGTQLEIVYGVFGYMQILSACFMSFAHGGNDVSNAIGPLAAALSILHGGASGAEI  
VIPTDVLAWGGFGIVAGLTMWGYRVIATIGKKITELTPTRGFAAEFAAASVVLVASKLGLPISATHTL  
VGAVMGVGFARGLNRVRAETVREIVASWAVTIPAGAFFSVVYTWILTKLLSYIL

>SpPHT2.1

MTLSYTLSSSTGNIISPD SRVLHSSHFNPPNRNRSFFSSETSLFKRETFPKPQQQQVPKSFLPILRLDS  
SKPAHPFASLS S YAEAGGEDEGIQTEKQQETVKKEDVSPGMAQAFDISSRTAS AISILIAFAALS VPL  
CMKTLGMGLDLKTKFLSYVTLLFGFYMAWNIGANDVANAMGTSVGSGALTIRQAVLTAAVLEFSG  
ALLMGTHVTSTMQNGILVANVFQGKETLLFAGLLSSLAAAGTWLQVASYFGWPVSTTHCIIGSMV  
GFLVYGGPGAVFWSSLARVTSSWVISPLMGAMVSFLVYKFIRRFVYSAPNPGQAAATAAPMAVF  
LGVTGISFAAFPLSKVFHLALAQAVASGAVGAFLVDRIIRKQLGHLLVKASSSQSEPKENAIHSKNIG  
LLSDFAGPKGTQLEIVYGVFGYMQILSACFMSFAHGGNDVSNAIGPLAAALSILHGGASGAEIVIPV  
DVLAWGGFGIVAGLMMWGYRVIATIGKKITELTPTRGFAAEFAAASVVLVASKLGLPISATHTLVGA  
VMGVGFARGLNSVRAETVREIVSWVVTIPVGAIFAVFYTWIMTKLLSYIL

>SiPHT2.1

MSQSSPFFSIARAHAGAGGAAAAALLRQPVAQLPTNIHSLRCFPSARVTHAKTLRSHLNLPRAT

LSSFADADDGSKTKPDEAEAGEEQNGECEMSEMAKAFHISPRMAMSISMTTFAALTVPLAMRSL  
VCRGTFKMSVLAYLTLLSGFYMAWNIGANDVANAMGTSVGSGALTRQAVLTAAVLEFSGAFLM  
GTHVTSTMQKGILVASVFQGKDSLLFAGLLSSLAAAGTWLQVASSYGWPVSTTHCIVGAMVGFGL  
VYGGVNAVFWSSLARVSSSWVISPLMGAAVSFLVYKCIRRFVYSAPNPGQAAAAAAPIAVFTGVT  
AISFAAFPLSKVFPIALLQALSCGAIGAIIVTRVIQKQLGELLSSEAEKIASADKSNVQQVGFLSDIAGP  
TGAQLQIVYGVFGYLQVLSACFMSFAHGGNDVSNAGPLAAALSILQGVASSAEIVIPTEVLAWGG  
FGIVAGLTMWGYRVIATIGKKITELTPTRGFAAEFAAASVVLFAASKLGLPISATHTLVGAVMGVGFSSR  
GLNRVRVETVREIVVSWLVTIPAGAVLCVLYTTILTILKILAYFM

>SvPHT2.1

MSQSSPFFSIARAHAGAGGRAAAAAALLRQPVAQLPTNIHSLRCFPSARVTHAKTLRSHLNLPRAT  
LSSFADADDGSKTKPDEAEAGEEQNGECEMSEMAKAFHISPRMAMSISMTTFAALTVPLAMRSL  
VCRGTFKMSVLAYLTLLSGFYMAWNIGANDVANAMGTSVGSGALTRQAVLTAAVLEFSGAFLM  
GTHVTSTMQKGILVASVFQGKDSLLFAGLLSSLAAAGTWLQVASSYGWPVSTTHCIVGAMVGFGL  
VYGGVNAVFWSSLARVSSSWVISPLMGAAVSFLVYKCIRRFVYSAPNPGQAAAAAAPIAVFTGVT  
AISFAAFPLSKVFPIALLQALSCGAIGAIIVTRVIQKQLGELLSSEAEKIASADKSNVQQVGFLSDIAGP  
TGAQLQIVYGVFGYLQVLSACFMSFAHGGNDVSNAGPLAAALSILQGVASSAEIVIPTEVLAWGG  
FGIVAGLTMWGYRVIATIGKKITELTPTRGFAAEFAAASVVLFAASKLGLPISATHTLVGAVMGVGFSSR  
GLNRVRVETVREIVVSWLVTIPAGAVLCVLYTTILTILKILAYFM

>SbPHT2.1

MSQSSPFFSIARVHAGAGGRAAAAAALLRRSISQLPHSIHGLRCFSSARVTPAKTLQSHLSLPRATLS  
SFADAEDGSSAEGSDKKAGEEQIGECEMSEMAKAFHISPRMAMSISVMIAFAALTVPLAMRSLVC  
HGTFKMNALAYFTLLSGFYMAWNIGANDVANAMGTSVGSGALTRQAVVTAAVLEFSGAFLMG  
THVTSTMQKGILVASVFQGKDSLLFAGLISSLAAAGTWLQVASSYGWPVSTTHCIVGAMVGFGLV  
YGGVNAVFWSSLARVSSSWVISPLMGAAVSFLVYKCIRRFVYSAPNPGQAAAAAAPIAVFAGVTAI  
SFAAFPLSKVFSIAILQAVSSGAIGAIIVSRVIKKQLGDLLSSEAEKIASTEKSNVQQAGLLSDIAGPTG  
AQLQIVYSVFGYMQVLSACFMSFAHGGNDVSNAGPLAAALSILQGVASSAEIVIPTEVLAWGGFG  
IVAGLTMWGYRVIATIGKKITELTPTRGFAAEFAAASVVLFAASKLGLPISATHTLVGAVMGVGFARGL  
NRVRAETVRDIVASWLVTIPVGAVLSIFYTLILTILKILAYLM

>SPHT2.2

MTSSSYLCSIRNSTKFVANNSNLFFPRQRLCVFTNETQFPKKDFVLKPKQTCCFSFLRLKKSSFKHPP  
AALSSFAESDDEKGENFEIKSHQENTISSEDEDELPGMAQAFHISSRTASAIICIALAALILPFFMKSL  
GQGLGFKYKILSYVTILFGFYMAWNIGANDVANAMGTSVGSGALSLRQAVVMAGVLEFSGALLM  
GTHVTNTMQKGILVANVFQGKDTLLFAGLLSSLAAAGTWLQVASYYGLPVSTTHCIVGSMVGFGL  
VYGGTGAVFWSSLARVISSWVISPLLGAUVSFLVYKCIRRFVYSARNPGKAAATAAPISVFLGVTGIS  
FVALPLSKTLNLALGQAITCGAISAFVDRIIRGQLGHLLAKASSEKETTTDTKNIGFLSDIAGPKGTQ  
LKIVYGVFGYMQVLSACFMSFAHGGNDVSNAGPLAAALSILQGGLSAADIVIPNDVLAWGGFGIV  
AGLTMWGYRVIATIGKKITELTPTRGFAAEFAAASVVLCAASKLGLPISGTHTLVGAVMGVGFARGFN  
SVRAETVREIATSWAVTIPAGATFAVIYTWIFTKLLSYLL

>SfPHT2.1

MLKLGRSCCSSSLEAAATDHGLLSRPALGRLHRRIFCWHVPAVGRIDTNPSSSRMCMQQPWHISS  
RSSRPRLTLSLPKCGNEQDSNTSVCSASLADAGEFHEEIESFQRLKTVKKVSESKGMDGMAEAFHIT  
PRLAVGITAAIGLAALVVPMPSSAPGMVFKTRALSYITLLFGFYMAWNIGANDVANAMGTSVG  
SGALSLRQAVLTAAVLEFSGAFMVGSHVSHTMQSGILTAGIFNGKDSLLFCGMLSSLGAAGTWLQ  
VASYFGWPVSTTHCIIGAMVGFGLIYGGIGAVYWKSLARVVASWVSPFLGAVVAFVYKCI RTFV

YSAPNPGQAAATAAPIAVFLGAAALSFTVFPSKASVGMAAAQALGFGFLAAIVINIVIRRLQGDLLG  
LFYELPAEGQVDEKASKQPVKFMGKVEGPKGTQLRIVYSVFGYLQVLSACFMSFAHGANDVANAI  
GPISAALAILHGTGLNTGAQPSMPIDVLAWGGFGIVAGLLVWGYRVIATIGEKITELTPTRGFAAEFA  
AATVVVLASRMGLPISATHTLVGAVMGVGFARGLNSVRGEVVREIVASWMVTIPVGAFLSVVYTFI  
LIRLIPSLV

>TcPHT2.1

MTPFSCLP SARNTTSPEAFLLRNPHLHVPKYRYNETQLPKKENLMWMPFQVPTRPYRPILSLTNSKL  
TQPSASISSFAEAEGEKEQKEGIQLETHDQEDAKTNDDDL PAMAQAFHISSRTASAI AIFIAFAALS  
L PFFMKSLGQGVSLKTKFLSYATLLFGFYMAWNIGANDVANAMGTSVGSGALT LRQAVLTA AILEFS  
GALLMGTHVTSTMQKGILVANVFQGKDSLLFAGLLSSLAAAGTWLQVASYYGWPVSTTHCIVGS  
MVGFGLVYGGAGAVFWSSLARVTSSWIVSPIMGAMVSFLVYKCIRRFVYSAHNPGQAAAAA API  
AVFVGVTGISFAAFPLSKSYAIGLAQALGCGAAGALLVHKIINKQLGHLLVKSISSSHSEPQENTTQN  
KNLGLLSDIAGPKGTQLEIVYGVFGYMQVLSACFMSFAHGGNDVSNAIGPLAAALSILQGGSGNEI  
VIPNDVLAWGGFGIVAGLMMWGYRVIATIGKKITELTPTRGFAAEFAAASVVL FASKLGLPISATHTL  
VGAVMGVGFARGLNRVRAETVREIVTSWVITIPVGASLAVLYTWILTKLLPNIS

>EsPHT2.1

MTLPYRFSSVRNHSLLLRTSHLCTPRSALGCFSPKESPFKKTSTIFLSPHKHTSLPLKLVCPLASFSSY  
ADSEGDEKHHGDQQIQNSNESSTNSTESDGKGN AEATGDFSGMAQAFNISSNTARAISIAIAFSA  
LSFPLFMKSLGQGLALKTKLLSYATLLFGFYMAWNIGANDVANAMGTSVGSGALTIRQAVMTAAV  
LEFSGALLMGTHVTSTMQKGILMANVFQGKDMLLFAGLLSSLAAAGTWLQVASYYGWPVSTTHC  
IVGSMVGFGLVYGGAGAVFWSSLAKVASSWVISPMGALVSFLVYKCIRRFVYSAPNPGQAAAAA  
APVAVFVGIASSISAAFP LSKTFPIAISQALACGAAGAIVFDRIIRNKLGHLLAKTKSPETSQNQPKSIG  
FLSDIAGPTGTQLEIVYGIFGYMQVLSACFMSFAHGGNDVSNAIGPLAAALSILQKGAAAGGGEIVI  
PMDVLAWGGFGIVAGLTMWGYRVIATIGKKITELTPTRGFAAEFAAASVVL FASKLGLPISATHTLV  
GAVMGVGFARGLNSVRAETVKEIVASWLVTIPVGATLAVIYTWVFTKILSFVL

>TpPHT2.1

MNLNHSCGFS LTKQTTKSISSFYLRNSQVFLFKNTSPLFLREFLHVKTLPFSTNITKSLRNCKLTHPFA  
SLSSFAEAEEGEESKEEIEHNNATKNGEKENNNGEVSGMAKAFNISSRTASAITICIAMAALVFPLF  
MTSLGQGLTKTKVLSYATLLFGLYMAWNIGANDVANAMGTSVGSGALT LRQAVLTA AAVLEFSG  
ALLMGTHVTSTMQKGILVANVFQGKDSLLFAGLLSSLAAAGTWLQFASYYGWPVSTTHCIVGAM  
VGFGLVYGGAGAVFWGSLARVISSWIFSPLLGA AVSFLVYKCIRRFVYSASNPGQAAAASAPIAVFL  
GVTGISFSAFPLSKTFPIALSQALACGTVGAFLVNRTIRKQLGHLLDKPNTTQSEPKDDDTAHQNIG  
FFSDITGPKGAQLEIVYGVFGYMQVLSACFMSFAHGGNDVSNAIGPLAAALAILQGA AKGAEIPI  
DVLAWGGFGIVAGLMMWGYRVIATIGKKITELTPTRGFAAEFAAASVVL FASKLGLPISATHTLVGA  
VMGVGFARGLNSVRSETVKEICASWAVTIPVGATLSVIYTWILTKLLSNVF

>ZaPHT2.1

MSQSSPLFSVARAHAGAGGRAVAAAALLRRRPIAQLPHSIHGLRCLSPARATPSKTL LSLPRATLSSF  
ADPDGDGGSSAKASDGGAKAGAGGEEQVGECEMSEMARAFHISPRVATSI SVTIAFAALT VPLAM  
RSLVCHGTFRMNALAYFTLLSGFYMAWNIGANDVANAMGTSVGSGALT LRQAVLTA AAVLEFSGA  
FLMGTHVTSTMQKGILVASAFQGKDSLLFAGLISSLAAAGTWLQVASSYGWPVSTTHCIVGAMVG  
FGLVYGGVD AVFWSSLARVSSSWVISPLMGA AVSFLVYKCIRRFVYSAPNPGQAAAAA APIAVFTG  
VTAISFAAFPLSKVFSIAILQAVSSGAIGAIIVSRVIQKQLGDLLSSEA EKIASAEKSSVQQAGFLSDIAG  
PTGAQLQIVYGVFGYMQVLSACFMSFAHGGNDVSNAIGPLAAALSILQGVASSAEIPI TEVLAW  
GGFGIVAGLTMWGYRVIATIGKKITELTPTRGFAAEFAAASVVL FASKLGLPISATHTLVGAVMGVGF

ARGLNRVRAETVREIVASWLV TIPVGAVLSIFYTLILT KILAYFM

>CaPHT2.1

MNLNHSCGFSLT KHTRKTSLTSS IYLNRSHIFLSREFLHV KPLPLSPNIAKNLKNCKLTHPFASLSSFAE  
AEGEEGSKEEIQ LNEHHQHAATENG ENNDEVSGMAKAFHISSRTASAITICIVMAALVFPLFMTSL  
GQGLALKTKMLS YGTL LFGFYMAWNIGANDVANAMGTSV GSGALSRLQAVLTA AVLEFSGALLM  
GTHVTSTMQKG ILVANVFQ GKDTLLFAGLLSSLAAAGTWLQFASYYGWPVSTTHCIVGAMVGF  
LVYGGAGAVFWGSLARVISSWIFSP LLGAAVSFIVYK CIRRFVYSASNPGQAAAAA APIAVFLGVTGI  
SFAAFPLSKIFPI ALSQALACGTVGAFLVNRTIRKQLGHLLDKSNTPDLEPVPQNI SFFSDITGPKGTQ  
LEIVYGVFGYMQVLSACFMSFAHGGNDVSN AIGPLAGALAILQGA AKGADIVIPIDVLAWGGFGIV  
AGLMMWGYRVIATIGKKITELTPTRGFAAEFAAASV VLFASKLGLPISGTHTLVGAVMGVGFARGF  
NNVRSETVKEICASWAVTIPVGATLSVIYT WILTKLLSYVL

>SmPHT2.1

MSQSSPFFSIARAHAGAGGRAAAAALLRCPAAQLPPTIHCPRYFRLAKVSPAKTLSSHLVLPRATL  
SSFADADDGSSANS DASGERSGGSELSEMAKAFHISPRMAMSSIVVIAFAALT VPLAMRSLLFHGT  
TKMKVLAYLTLLSGFYMAWNIGANDVANAMGTSV GSGALT LRQAVLTA AVLEFSGAFLMGTHVT  
STMQKGILVTSV FQGNDSLLFAGLLSSLAAAGTWLQVASSYGW PVSTTHCIVGAMVGFGLVYGG  
VNAVFWSSLARVSSSWLISPLMGA AVSFLVYK CIRRFVYSAPNPGQAAAA SAPIAVFTGVT AISFAA  
FPLSRTFSIAVLQALVCGAIGAVFVSRAIKKQLGDLLSSEA EKIATADNTDVQ QGGFDVAGPRGAQL  
QIVYGVFGYMQVLSACFMSFAHGGNDVSN AIGPLAAALSLLQGVASSAEIVIPTEVLAWGGFGIVA  
GLTMWGYRVIATNWQEK SPELTPTRGFAAEFAAASV VLFASKLGLPISATHTLVGAVMGVGFARG  
LNRVRAETVREIVSWVVTIPVGALLSVFYTLILT KILKYFM

>TaPHT2.1

MAKDQLQVLNALDVAKTQLYHFTAIVIAGMGFFTDAYDLFCISLVTKLLGRIYYHHDGAPKPGTLP  
PNVSAAVNGVAF CGTLAGQLFFGWLGD KMGRKRVYGMTLMMMVICSIASGLSFGHTPKSVMTT  
LCFFRFWLGF GIGGDYPLSATIMSEYANKKTRGAFIAAVFAMQGF GILAGGMVAIIVSAAFKGA FPA  
QTYQTDPLGSTVSQAD FVWRIILMFGAIPAAMTY YWRMKMPETARYTALVAKNLKQAANDMSK  
VLQVDIEEEQEKVENVSQ NTRNEFGLFSKEFLRRHGLHLLGTASTWFLLDIAFY SQNL FQKDIFSAIG  
WIPPAQTMNALEE VYKIARAQTLIALCSTVPGYWFTVFFIDKIGRF AIQLMGFFFM TVFMFALAI P YH  
HWT LKDN RIGFVIMYSLTFFFANFGPNATT FVVP AEIFPARLRSTCHGISAAAGKAGAMIGA FGLY  
AAQPTDRKKADAGYPAGIGVRNSLIVLGC VNFLGMVFTFLVPESKGKSLEEMSRENEGEEESGTEM  
KNSGRTVPV

>PHO84

MSSVNKDTIHVAERSLHKEHLTEGGNMAFHNLNDFAHIEDPLERRRLAESIDDEFGWQQVKT  
ISIAGVGFLTDSYDIFAINLGITMMSYVYWHGSM PGPSQTLLKVSTSVGT VIGQFGFGLADIVGRK  
RIYGMELIIMIVCTILQTTVAHSPAINFVAVLTFYRIVMGIGIGGDYPLSSIITSEFATTKWRGAIMGAV  
FANQAWGQISGGIILVAAYKGELEYANSGAECDARCQKACDQMWRILIGLGTVLGLACLYFRL  
TIPESPRYQLDVNAKLELAAA AQEQDGEKKIHDTSD EDMAINGLERASTAVESLDNHPPKASF KDF  
CRHFGQWKY G KILLGTAGSWFTLDVAFYGLSLNSAVILQTIGYAGSKNVYKKLYDTAVGNLILICAG  
SLPGYWVSVFTVDIIGRKPIQLAGFIILTALFCVIGFAYHKLGDHGLLALYVICQFFQNF GPNTTTT FIVP  
GECFPTRYR

>PHO89

MALHQFDYIFAIAMLFAFLDAFNIGANDVANSFASSISSRSLKYWQAMVLAGLCEFLGAVLAGARV  
SGTIKNNIIDSSIFTNDPAVLMLTMTSALIGSSCWLT FATAIGMPVSTTHSIVGGTIGAGIAAGGANG  
VWGWWSGVSQIIASWFIAPILAGAIAAIVFSISRFSVLEVKSLSERSIKNALLLVGVLVFATFSILTMLIVW

KGSPNLHDDLSETETAVSIVLTGAIASIVYFIFYPFYRRKVLQDWTCLKLIDIFRGPSFYFKSTDDIPP  
MPEGHQLTIDYYEGRRNLGTTVSVEDDEENKAASNSNDSVKNKEDIQEVDLVRTETEPETKLSTKQY  
WWSLLKQGPKKWPLLFVLVISHGWTQDVIHAQVNDRDMLSGDLKGMYSKFDNRVEYIYSV  
LQAITAATMSFAHGANDVANATGPLSAVYVIWKTNTIGAKSEVPVWVLAYGGVALVIGCWYGY  
NIIKNLGNKMILQSPSRGFSIELAVAITTVMATQLGIPTSTTQIAVGGIVAVGLCNKDLKSVNWRMV  
AWCYSGWFLTLPIAGLIAGIINGIILNAPRFGVEYQMT
