# Supplementary material for: Effects of Soybean Phosphate Transporter Gene GmPHT2 on Pi Transport and Plant Growth under Limited Pi Supply Condition
Source: MDPI journal article supplement (doi:10.3390/ijms241311115), 2023-07-05
Supplement: s1 [file s1]

**Table S4.** Primers used for GmPHT2 PCR analysis.

| ID               | Prime                                  |
|------------------|----------------------------------------|
| PHT2;1-pYES2F    | CGGAATTCATGAATCCCTCTTGTCGCTT           |
| PHT2;1-pYES2R    | CATGCATGCTAAAATATAAGACAAAATCTTAGTCAAGA |
| PHT2;1-p1302SNBF | GGGGTACCATGAATCCCTCTTGTCGCTT           |
| PHT2;1-p1302SNBR | GCGTCGACTAAAATATAAGACAAAATCTTAGTCAAGA  |
| PHT2;1-pPSNF     | GCGTCGACATGAATCCCTCTTGTCGCTT           |
| PHT2;1-pPSNR     | GGGGTACCTAAAATATAAGACAAAATCTTAGTCAAGA  |
| PHT2;2-pYES2F    | CGGGATCCATGAATCCCTCTTGTCGCTT           |
| PHT2;2-pYES2R    | CATGCATGCTAAAATATAGGACAAAATCTTAGTCAAG  |
| PHT2;2-p1302SNBF | CGGGATCCATGAATCCCTCTTGTCGCTT           |
| PHT2;2-p1302SNBR | GGGGTACCTAAAATATAGGACAAAATCTTAGTCAAG   |
| qPHT2;1-F        | CTGAGGGAGAACAACAAGAGAA                 |
| qPHT2;1-R        | AAGCCGTTCGAGACGATATG                   |
| qPHT2;2-F        | AGGGTGCTCAACTGGAAATAG                  |
| qPHT2;2-R        | CGGCACCACCTTGAAGAATA                   |
